# Supplementary material
Source: Springer Nature journal article supplement (https://www.springermedizin.de/resource/supplementary/12889_2013_6537_MOESM2_ESM.pdf/9498462)

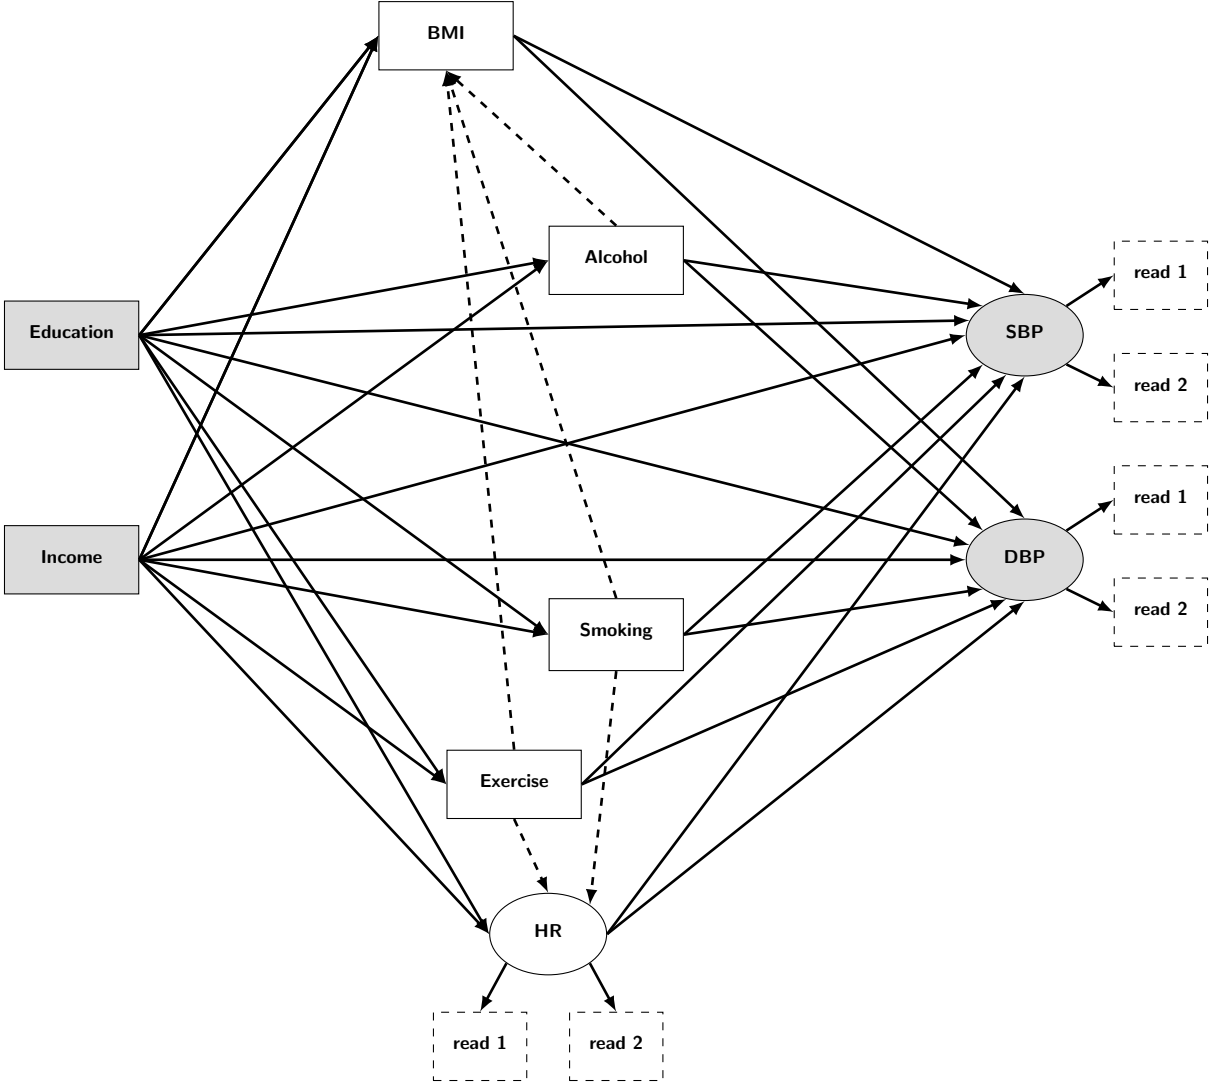

Supplement: MOESM2 [file 9498462]
